# 1 **Postural analysis reveals persistent vigilance in paper** 2 **wasps after conspecific challenge**

3 Andrew W. Legan<sup>a,1,2</sup>, Caleb C. Vogt<sup>a,1</sup>, Michael J. Sheehan<sup>a</sup>

4 a. Laboratory for Animal Social Evolution and Recognition, Department of Neurobiology and  
5 Behavior, Cornell University, Ithaca, NY

6 1. These authors contributed equally to this work.

7 2. Correspondence: [andrew.w.legan@gmail.com](mailto:andrew.w.legan@gmail.com)

## 8 **ABSTRACT**

9 Vigilant animals detect and respond to threats in the environment, often changing posture  
10 and movement patterns. In social animals vigilance is modulated not only by predators but also  
11 by threatening conspecifics. Precisely how social interactions alter vigilance behavior over time  
12 is not well understood. We report persistent effects of a simulated social challenge on the  
13 vigilance behavior of wild northern paper wasp foundresses, *Polistes fuscatus*. During the  
14 founding phase of the colony cycle conspecific wasps may usurp nests from the resident  
15 foundress, representing a severe threat. Using postural tracking, we found that after simulated  
16 intrusions wasps displayed increased vigilance during the minutes after the threat was removed.  
17 Sustained vigilance elicited after social threat manifested as increased movement, greater  
18 bilateral wing extension, and reduced antennal separation. However, no postural changes were  
19 observed after a control stimulus presentation. By rapidly adjusting individual vigilance behavior  
20 after fending off a conspecific intruder, paper wasp foundresses invest in surveillance of  
21 potential social threats, even when such threats are no longer immediately present. The  
22 prolonged state of vigilance observed here is relevant to plasticity of recognition processes as a  
23 result of conspecific threats.

24 **Keywords:** Behavioral plasticity, social insect, field assay, pose estimation.

## 25 INTRODUCTION

26 Vigilance behavior in animals is demonstrated by changes in movement and body  
27 posture, famously in the still, bipedal stance of meerkat sentinels [1]. Movement and posture of  
28 specific body parts, especially the head and sensory organs, are primarily responsible for  
29 vigilance quality because they directly influence perception. For example, chaffinches turn their  
30 heads more after seeing a cat [2] and vigilant baboons blink less [3]. Animals must sometimes  
31 sacrifice vigilance quality in favor of other important activities, for example in the case of  
32 feeding juncos forfeiting some vigilance quality to lower their heads and eat [4].

33 Social animals, though characterized by their cooperative associations, face threats posed  
34 by conspecifics [5]. Recognition is an important mechanism mediating intraspecific aggression  
35 because encounters with different individuals and classes of individuals may impact fitness in  
36 distinct ways [6-10]. Social insects exhibit plasticity in nest guarding behavior in response to the  
37 frequency and valence of interactions with different classes of individuals (e.g., nestmates and  
38 non-nestmates) [11-14]. In response to encounters with non-nestmates, honeybees restrict  
39 admittance to the colony, sometimes rejecting their own nestmates [15,16]. These rejection  
40 errors are consistent with the signal detection theory concept of a shifting acceptance threshold  
41 [17]. With more frequent intruder encounters, the cost of accidentally accepting intruders  
42 increases, and the acceptance threshold is reduced to minimize acceptance errors. An alternative  
43 view considers variation in recognition behavior in terms of investment in recognition accuracy  
44 [18]. Recognition accuracy may be improved by persistent vigilant behavior of guards. Shifts in  
45 vigilance at the group level have been documented in honey bees, which allocate more guards at  
46 the colony entrance in response to threats [15,16,19]. How persistent vigilance is manifested in  
47 individual movement and posture has not been examined in a social insect.

48 To approach this question, we studied the northern paper wasp *Polistes fuscatus*. Paper  
49 wasps are ideal for field-based digital tracking because their unenveloped nest represents a fixed  
50 arena easily recordable by video. Automated tracking of wild foundress behavior is an as-yet  
51 unapplied tool for understanding the effects of intruder encounters on vigilance. During nest  
52 founding in the spring, *Polistes* foundresses guard the nest from conspecific wasps which may  
53 rob their brood or usurp their nests [20-25]. We simulated a guard context during the founding  
54 phase of single foundress *P. fuscatus* nests and leveraged digital tracking software to analyze  
55 wasp movement and posture.

## 56 **METHODS**

57 We studied solitary *P. fuscatus* foundresses on their nests at the Liddell Field Station in  
58 Ithaca, NY (42°27'36.7" N, 76°26'39.2" W). In the spring of 2020, wild wasps initiated nests in  
59 modified wooden bird boxes (11.5 cm x 12.5 cm x 13.5 cm). Experiments were carried out from  
60 July 4<sup>th</sup> to July 9<sup>th</sup>, 2020, before workers emerged, between 2PM and 9PM EST, during the  
61 active phase of wasps during peak summer. The mean nest size was  $33 \pm 8$  (SD) cells. The  
62 experimental apparatus consisted of a 162.5 cm wooden dowel (7 mm diameter) guided through  
63 a 122 cm metal cylinder (1 cm diameter), taped to a step ladder (figure S1). The assays were  
64 video-recorded from below using a tripod-mounted Nikon D7200 camera with a Sigma Macro  
65 HSM lens and optical stabilizer (focal length: 105 mm; aperture: f/2.8).

66 Intruder wasps were collected from nests at a site (42°24'57.6" N, 76°31'22.6" W) 8.15  
67 km southwest of the Liddell Station to ensure that foundresses had not encountered intruders  
68 before the experiment and were unlikely to be closely related [26]. Wasps were size matched to  
69 lures within  $0.028 \pm 0.013$  grams (SD). Immediately before each simulated intruder trial, the  
70 intruder wasp was freeze-killed and fixed to a wooden dowel using an insect pin. Unique  
71 intruders were presented in each intruder trial. On a different day, each wasp was presented with  
72 the wooden dowel alone. All assays consisted of three 320 second intervals: pre-stimulus,  
73 stimulus, and post-stimulus. All nests were undisturbed, with experimental apparatus in place,  
74 for  $\geq 5$  min before beginning the pre-stimulus interval. During the stimulus presentation in both  
75 simulated intruder and wooden dowel trials, the stimulus was moved slightly by the experimenter  
76 at one-minute intervals to animate the stimulus. Three foundresses were excluded from analysis  
77 because a live intruder visited the nest during the experiment, and one foundress was excluded  
78 from analysis because it was accidentally flushed from the nest while setting up the experimental  
79 apparatus. Ultimately six foundresses were assayed.

80 We used SLEAP [27] to track seven points on the wasps: antennae tips, head, thorax-  
81 abdomen bridge (propodeum), abdomen tip, and wing tips (figure 1a). SLEAP was installed on a  
82 PC with a GeForce RTX 2080i graphics card. Videos were converted to gray scale and 20 frames  
83 per interval were manually labeled. We compared wing and antennae separation angle before and  
84 after stimulus presentations using paired t-tests. Statistical analysis was done using R version  
85 3.6.1 [28].

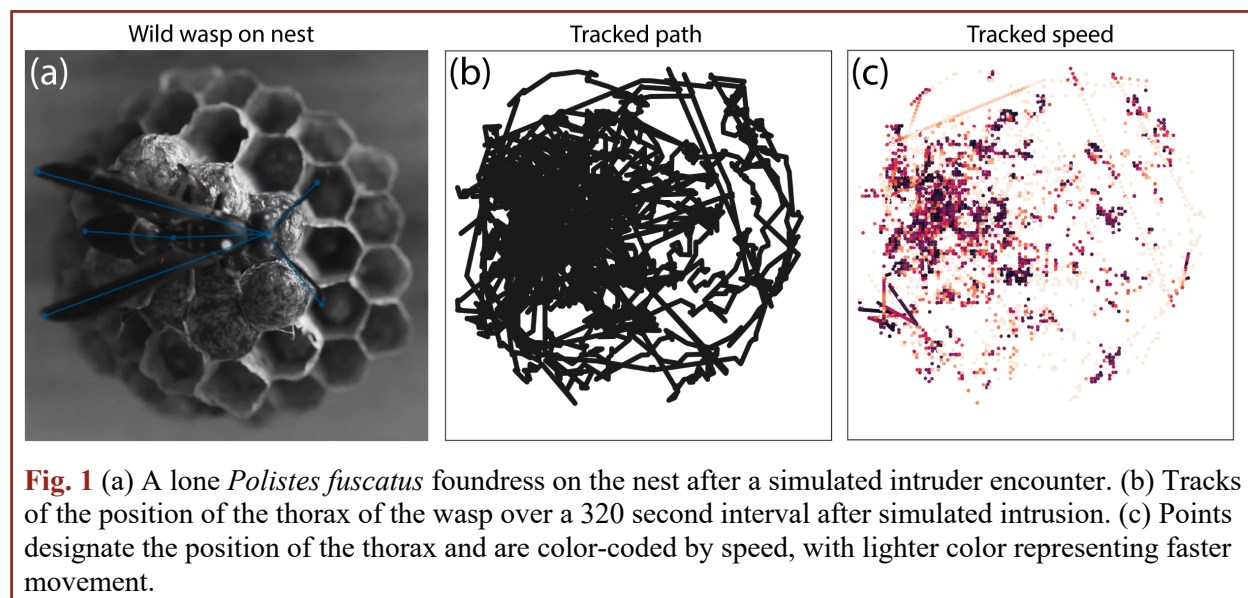

86 **Fig. 1** (a) A lone *Polistes fuscatus* foundress on the nest after a simulated intruder encounter. (b) Tracks  
87 of the position of the thorax of the wasp over a 320 second interval after simulated intrusion. (c) Points  
88 designate the position of the thorax and are color-coded by speed, with lighter color representing faster  
89 movement.

## 90 RESULTS

91 When the lure was presented during simulated intruder trials, wasps responded by  
92 antennating the lure, then responded aggressively by biting, mounting, and stinging the lure  
93 (video S1). These are all stereotyped wasp aggressive behaviors [29-31]. In control stimulus  
94 trials, wasps investigated the dowel, including antennation and occasional mounting, but did not  
95 escalate aggression (video S1). SLEAP successfully tracked body parts in  $84 \pm 21\%$  (SD) of  
96 frames across body parts before and after stimulus presentation (table S1).

97 Simulated intruder encounters caused persistent changes in movement and posture while  
98 control experiments did not. Exposure to the simulated intruder caused an increase in the total  
99 distance traveled after the intruder was removed (head:  $t = -2.5682$ ,  $df = 5$ ,  $P\text{-value} = 0.05014$ ;  
100 thorax:  $t = -2.9614$ ,  $df = 5$ ,  $P\text{-value} = 0.03147$ ; figure 2a). Dowel presentations did not lead to  
101 sustained increases in movement afterward (head:  $t = 0.27264$ ,  $df = 5$ ,  $P\text{-value} = 0.796$ ; thorax:  $t$   
102  $= 0.037249$ ,  $df = 5$ ,  $P\text{-value} = 0.9717$ ; figure 2a). Wing posture was affected by the simulated  
103 intruder. The mean wing extension angle after intruder encounter was significantly greater than  
104 before ( $t = -6.1917$ ,  $df = 5$ ,  $P\text{-value} = 0.001603$ ; figure 2b). No significant change in wing  
105 extension angle was observed after the wooden dowel presentation ( $t = -1.2836$ ,  $df = 5$ ,  $P\text{-value} =$   
106  $0.2556$ ; figure 2b). There was a significant decrease in the mean antennal separation angle after  
107 intruder encounter ( $t = 4.1753$ ,  $df = 5$ ,  $P\text{-value} = 0.008695$ ; figure 2c). No significant change in

108 mean antennal separation angle was observed after the wooden dowel presentation ( $t = 0.40974$ ,  
109  $df = 5$ ,  $P$ -value = 0.699; figure 2c).

110 The rapid and varied movement of wasps during simulated intruder presentations, and the  
111 presence of a second, pinned wasp, precluded successful digital tracking. However, digital  
112 tracking during the dowel presentations was feasible. During the dowel presentation, wasps did  
113 not move more than they did before the presentation, based on the total distance traveled by the  
114 thorax ( $t = -1.2475$ ,  $df = 5$ ,  $P$ -value = 0.2675; figure S2a). There was a significant increase in  
115 wing extension angle during the dowel presentation compared to before ( $t = -2.8063$ ,  $df = 5$ ,  $P$ -  
116 value = 0.03771; figure S2b). This increase in wing extension did not persist after the dowel was  
117 removed.

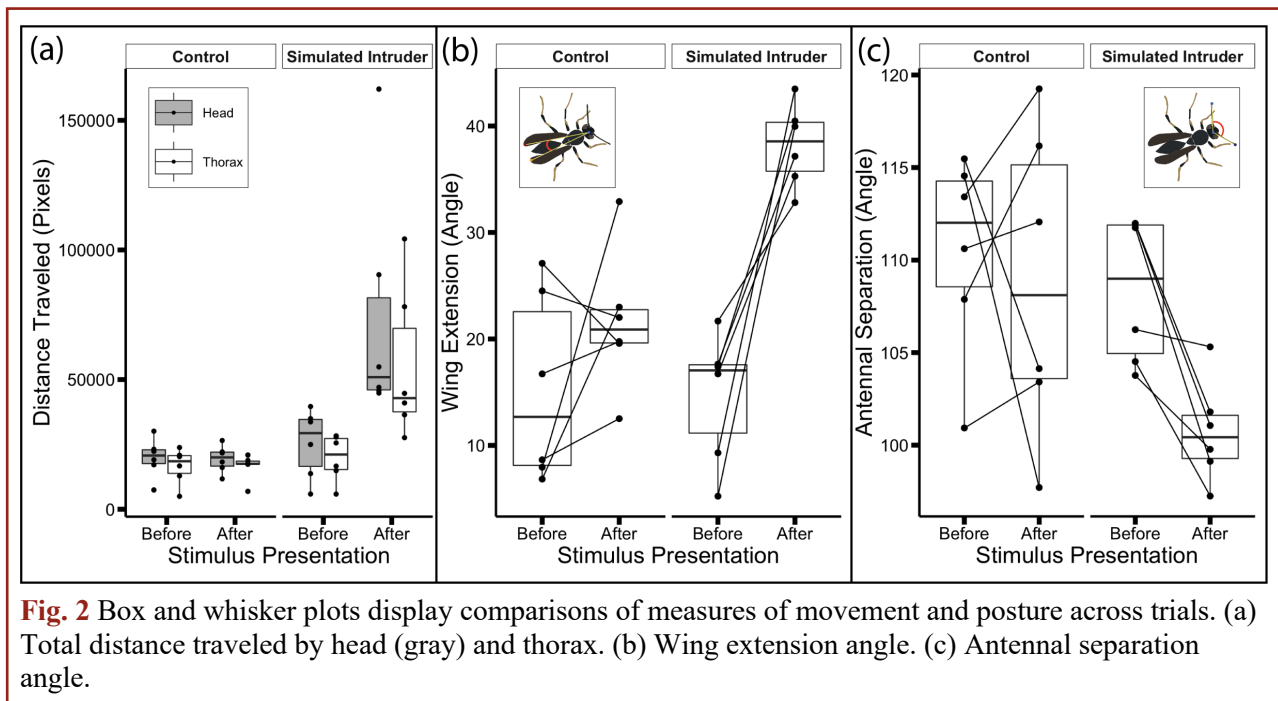

## 121 **DISCUSSION**

122 Social challenge presented by simulated conspecific intruders elicited sustained vigilance  
123 in *P. fuscatus* spring foundresses. We leveraged computer vision to analyze wasp body posture in  
124 the field and found that sustained vigilance manifested in changes to wasp movement and  
125 posture.

126 Methods in automated tracking of behavior have been applied by scientists studying  
127 neurobiological mechanisms of animal movement and pose, collective behavior, and social  
128 interactions [32-35]. Automated tracking studies of insects are often carried out in controlled  
129 environments, which is feasible when the behavior of interest is robust to laboratory conditions.  
130 For example, digital tracking has been used to characterize the foraging behavior of hawkmoths  
131 *Manduca sexta* [36-38], and to characterize the wing kinematics of flies and honey bees as well  
132 as honey bee wing fanning behavior [39-41]. Complex social behaviors are less robust to  
133 experimental laboratory conditions, requiring field observations to draw reliable conclusions. But  
134 few studies have applied digital tracking of individual social insect posture in the wild (but see  
135 ref. 41).

136 *Polistes* paper wasps are ideal for computer vision-assisted digital tracking and pose  
137 estimation in the field. Compared to eusocial ants, bees, and hornets, *Polistes* societies remain  
138 relatively small, peaking at ~135 cells [20]. *Polistes* colonies are generally single-layer nests. In  
139 terms of video recording, a drawback to this architecture is that there is usually space between  
140 the nest and the substrate to which it is fixed, so wasps can crawl out of view of the camera  
141 behind the nest. While the nest can be treated as two-dimensional for the purpose of digital  
142 tracking, the wasp's body is not always parallel to this plane, leading to difficulties in tracking a  
143 wasp perched on the side of the nest. These challenges could be solved with multiple cameras  
144 recording the nest from different angles, as has been done recently for 3-dimensional tracking in  
145 laboratory rodents [42,43]. Another challenge for digital tracking is the rapid movement of  
146 wasps during the simulated intrusions, but cameras with faster frame rates could overcome this  
147 issue.

148 Natural threats that would induce nest-guarding behavior in solitary foundresses include  
149 intraspecific brood-robbing and nest usurpation [23-25]. In a study of multiple foundress *P.*  
150 *fuscatus* nests during the founding phase, natural encounters with intruders occurred about once  
151 per day, with intruders evicted within 40 seconds [25]. Three trials in our study were interrupted

152 by natural intruders, highlighting the pervasive nature of conspecific threats for *P. fuscatus*  
153 foundresses. The 320 second lure presentation in our assays likely simulated a worst-case  
154 scenario for foundresses, akin to a nest usurpation attempt.

155 Postural changes displayed by vigilant wasps included wing extension and reduced  
156 antennal separation. Upon presentation with the simulated intruder, wasps approached the lure  
157 with outstretched antennae before reacting aggressively. In general, social insects utilize  
158 chemical cues to discriminate nestmates and non-nestmates [44-46]. While *P. fuscatus* wasps  
159 rely on vision to recognize individuals, nestmate recognition is mediated by olfaction [47,48].  
160 The honeybee *Apis mellifera* responds to different odors with different antennal posture,  
161 depending on experience, demonstrating the function of antennal posture in perceiving odors  
162 [49,50]. Reduced antennal separation may indicate that wasps are orienting their antennae to  
163 detect chemical cues, such as the cuticular hydrocarbon signatures used by many social insects to  
164 discriminate nestmates and non-nestmates [51-54]. Visual cues may also be important in  
165 discriminating nestmates and non-nestmates at the early phases of the colony cycle, and the  
166 absence of nestmates may favor universal rejection [17,55].

167 Vigilant wasps moved more after fighting a simulated intruder, as measured by total  
168 distance traveled. This increased movement was observed throughout the 320 s interval after the  
169 simulated intruder was removed (figure S3). By moving throughout the nest surface, vigilant  
170 guard wasps may be better prepared to defend against an intruder approaching from any  
171 direction.

172 In *Polistes*, wing extension and antennal separation may be useful measures for studying  
173 how the social environment influences internal state. The reliable associations between unilateral  
174 wing-extension and courtship, and between bilateral wing extension and aggression, have been  
175 useful measures for studying the neural basis of aggression and courtship in the fly *Drosophila*  
176 *melanogaster*, especially the roles of P1 neurons in orchestrating persistent internal states  
177 causing aggression and courtship [56,57].

178 The internal state associated with vigilance in *P. fuscatus* may represent an emotional  
179 primitive, as defined by Anderson and Adolphs [58] as an internal state exhibiting scalability,  
180 valence, persistence, and generalization. Regarding scalability, we found evidence that wing  
181 extension can be ordered along a gradient corresponding to low vigilance (before stimulus),  
182 medium vigilance (during dowel presentation), and high vigilance (after simulated intruder

183 presentation, demonstrating behavioral persistence) (figure S2). *P. fuscatus* vigilance behavior is  
184 associated with aggression towards conspecific intruders, suggesting negative valence. After  
185 social challenge, vigilance is persistent. More work is needed to assess the generalization of *P.*  
186 *fuscatus* vigilance behavior, for example by presenting wasps with neutral stimuli after social  
187 challenge.

188 Increased encounters with non-nestmate intruders can shift social insect recognition  
189 processes to become more exclusive, resulting in recognition error in the form of increased  
190 aggression towards nestmates [11,14-16,59]. From the perspective of signal detection theory,  
191 individual vigilance could be mechanistically related to acceptance threshold. If persistent  
192 vigilance and acceptance threshold shift are coupled, then there will be more aggression towards  
193 nestmates following intruder encounters. Alternatively, vigilance may affect recognition  
194 independent of acceptance threshold. For example, persistent vigilance may accompany  
195 increased investment in accurate recognition [18]. Evidence supporting this hypothesis may be  
196 found in the carpenter ant: exposure to alarm pheromone increased accuracy of both nestmate  
197 acceptance and non-nestmate rejection [60]. Persistent vigilance may therefore increase  
198 recognition accuracy, while the acceptance threshold is shifted depending on non-nestmate  
199 encounter rates [17]. Future work should explore how individual wasp vigilance relates to shifts  
200 in nestmate recognition processes.

## 201 **DATA ACCESSIBILITY**

202 Videos are available on Zenodo: <https://doi.org/10.5281/zenodo.6582229>. The electronic  
203 supplementary material includes outputs of tracking (30 csv files), table S1 (1 excel file and 1  
204 csv), video S1 (1 mp4 file) and Appendix S1 containing figures S1-S3 (1 pdf file).

## 205 **FUNDING**

206 This work was supported by National Science Foundation [Graduate Research Fellowship  
207 Program DGE-1650441 to AWL, CAREER grant DEB-1750394 to MJS], Cornell University  
208 [Neurobiology and Behavior Departmental Grant to CCV], and National Institutes of Health  
209 [DP2-GM128202 to MJS], and by the North American Section of the International Union for the  
210 Study of Social Insects (IUSSI) Robert L. and Louise B. Jeanne Social Wasp Research Grant [to  
211 AWL].

## 212 **AUTHOR CONTRIBUTIONS**

213 AWL conceptualized and carried out field experiments, carried out analyses, and wrote the  
214 paper. CCV manually labeled frames and used digital tracking software to generate tables of  
215 tracked body parts. All authors contributed to conceptualizing analyses. All authors helped edit  
216 the manuscript.



217 **REFERENCES**

- 218 [1] Santema P, Clutton-Brock T. (2013) Meerkat helpers increase sentinel behaviour and bipedal  
219 vigilance in the presence of pups. *Animal Behaviour* 85(3):655-661.
- 220 [2] Jones KA, Krebs JR, Whittingham MJ. (2007) Vigilance in the third dimension: head  
221 movement not scan duration varies in response to different predator models. *Animal Behaviour*  
222 74(5):1181-1187.
- 223 [3] Matsumoto-Oda A, Okamoto K, Takahashi K, Ohira H. (2018) Group size effects on inter-  
224 blink interval as an indicator of antipredator vigilance in wild baboons. *Scientific Reports*  
225 8:10062.
- 226 [4] Lima SL, Bednekoff PA. (1999) Back to the basics of antipredatory vigilance: can  
227 nonvigilant animals detect attack? *Animal Behaviour* 58:537-543.
- 228 [5] Abbot P. (2022) Defense in social insects: diversity, division of labor, and evolution. *Annual*  
229 *Review of Entomology* 67:407-436.
- 230 [6] Mateo JM. (2004) Recognition systems and biological organization: the perception  
231 component of social recognition. *Annales Zoologici Fennici* 41:729-745.
- 232 [7] Bourke AFG. (2011) Social group maintenance. In *Principles of Social Evolution*. Oxford  
233 University Press Inc., New York.
- 234 [8] Gherardi F, Aquiloni L, Tricarico E. (2012) Revisiting social recognition systems in  
235 invertebrates. *Animal Cognition* 15(5):745-762.
- 236 [9] Leonhardt SD, Menzel F, Nehring V, Schmitt T. (2016) Ecology and evolution of  
237 communication in social insects. *Cell* 164:1277-1287.
- 238 [10] Sheehan MJ, Bergman TJ. (2016) Is there an evolutionary trade-off between quality  
239 signaling and social recognition? *Behavioral Ecology* 27(1):2-13.
- 240 [11] Starks PT, Fischer DJ, Watson RE, Melikian GL, Nath SD. (1998) Context-dependent  
241 nestmate discrimination in the paper wasp, *Polistes dominulus*: a critical test of the optimal  
242 acceptance threshold model. *Animal Behaviour* 56:449-458.
- 243 [12] Liebert AE, Starks PT. (2004) The action component of recognition systems: a focus on the  
244 response. *Annales Zoologici Fennici* 41(6):747-764.
- 245 [13] Fürst MA, Durey M, Nash DR. (2011) Testing the adjustable threshold model for intruder  
246 recognition on *Myrmica* ants in the context of a social parasite. *Proceedings of the Royal Society*  
247 *B* 279:516-522.

- 248 [14] Mora-Kepfer F. (2014) Context-dependent acceptance of non-nestmates in a primitively  
249 eusocial insect. *Behavioral Ecology and Sociobiology* 68:363-371.
- 250 [15] Downs SG, Ratnieks FLW. (2000) Adaptive shifts in honey bee (*Apis mellifera* L.) guarding  
251 behavior support predictions of the acceptance threshold model. *Behavioral Ecology* 11(3):326-  
252 333.
- 253 [16] Couvillon MJ, Robinson EJM, Atkinson B, Child L, Dent KR, Ratnieks FLW. (2008) En  
254 garde: rapid shifts in honeybee, *Apis mellifera*, guarding behaviour are triggered by onslaught of  
255 conspecific intruders. *Animal Behaviour* 76(5):1653-1658.
- 256 [17] Reeve HK. (1989) The evolution of conspecific acceptance thresholds. *The American*  
257 *Naturalist* 133:407-435.
- 258 [18] Sheehan MJ, Reeve HK. (2020) Evolutionarily stable investments in recognition systems  
259 explain patterns of discrimination failure and success. *Philosophical Transactions of the Royal*  
260 *Society B* 375(1802): 20190465.
- 261 [19] Breed MD, Smith TA, Torres A. (1992) Role of guard honey bees (Hymenoptera: Apidae)  
262 in nestmate discrimination and replacement of removed guards. *Annals of the Entomological*  
263 *Society of America* 85(5):633-637.
- 264 [20] Reeve HK. (1991) *Polistes*. In: Ross KG, Matthews RD, editors. *The social biology of*  
265 *wasps*. Ithaca (NY): Cornell University Press. p. 99-148.
- 266 [21] Sheehan MJ, Botero CA, Hendry TA, Sedio BE, Jandt JM, Weiner S, Toth AL, Tibbetts  
267 EA. (2015) Different axes of environmental variation explain the presence vs. extent of  
268 cooperative nest founding associations in *Polistes* paper wasps. *Ecology Letters* 18:1057-1067.
- 269 [22] Miller SE, Blucher SE, Bell E, Cini A, da Silva RC, de Souza AR, Gandia KM, Jandt J,  
270 Loope K, Prato A, et al. (2018) WASPnest: a worldwide assessment of social Polistine nesting  
271 behavior. *Ecology* 99(10):2405.
- 272 [23] Sakagami SF, Fukushima K. (1957) Reciprocal thieving found in *Polistes fedwigae* Dalla  
273 Torre. *Journal of Kansas Entomological Society* 30:140.
- 274 [24] Kasuya E, Hibino Y, Itô Y. (1980) On "intercolonial" cannibalism in Japanese paper wasps,  
275 *Polistes chinensis antennalis* Pérez and *P. jadwigae* Dalla Torre (Hymenoptera: Vespidae).  
276 *Population Ecology* 22(2):255-262.
- 277 [25] Gamboa GJ, Wacker TL, Duffy KG, Dobson SW, Fishwild TG. (1992) Defence against  
278 intraspecific usurpation by paper wasp cofoundresses (*Polistes fuscatus*, Hymenoptera:  
279 Vespidae). *Canadian Journal of Zoology* 70:2369-2372.

- 280 [26] Blucher SE, Miller SE, Sheehan MJ. (2020) Fine-scale population structure but limited  
281 genetic differentiation in a cooperatively breeding paper wasp. *Genome Biology and Evolution*  
282 12(5):701-714.
- 283 [27] Pereira TD, Tabris N, Matsliah A, Turner DM, Li J, Ravindranath S, Papadoyannis ES,  
284 Normand E, Deutsch DS, Wang ZY, et al. (2022) SLEAP: A deep learning system for multi-  
285 animal pose tracking. *Nature Methods* 19:486-495.
- 286 [28] R Core Team. (2019) R: A language and environment for statistical computing. R  
287 Foundation for Statistical Computing, Vienna, Austria. Available online at: [https://www.R-](https://www.R-project.org/)  
288 [project.org/](https://www.R-project.org/)
- 289 [29] West-Eberhard MJ. (1969) The social biology of Polistine wasps. *Miscellaneous*  
290 *Publications, Museum of Zoology, University of Michigan* 15:1-101.
- 291 [30] Lorenzi MC, Bagnères AG, Clément JL, Turillazzi S. (1997) *Polistes biglumis bimaculatus*  
292 epicuticular hydrocarbons and nestmate recognition (Hymenoptera, Vespidae). *Insectes sociaux*  
293 44:123-138.
- 294 [31] Tumulty JP, Miller SE, Van Belleghem SM, Weller HI, Jernigan CM, Vincent S,  
295 Staudenraus RJ, Legan AW, Polnaszek TJ, Uy FMK, Walton A, Sheehan MJ. (2021) Evidence  
296 for a selective link between cooperation and individual recognition. bioRxiv DOI:  
297 <https://doi.org/10.1101/2021.09.07.459327>
- 298 [32] Dell AI, Bender JA, Branson K, Couzin ID, de Polavieja GG, Noldus LPJJ, Pérez-Escudero  
299 A, Perona P, Straw AD, Wikelski M, Brose U. (2014) Automated image-based tracking and its  
300 application in ecology. *Cell Press* 29:417-428.
- 301 [33] Crall JD, Gravish N, Mountcastle AM, Kocher SD, Oppenheimer RL, Pierce NE, Combes  
302 SA. (2018) Spatial fidelity of workers predicts collective response to disturbance in a social  
303 insect. *Nature Communications* 9:1201.
- 304 [34] Mathis MW, Mathis A. (2020) Deep learning tools for the measurement of animal behavior  
305 in neuroscience. *Current Opinion in Neurobiology* 60:1-11.
- 306 [35] Wang ZY, McKenzie-Smith GC, Liu W, Cho HJ, Pereira T, Dhanerawala Z, Shaevitz JW,  
307 Kocher SD. (2022) Isolation disrupts social interactions and destabilizes brain development in  
308 bumblebees. *Current Biology* 32:1-11.
- 309 [36] Dahake A, Stöckl AL, Foster JJ, Sane SP, Kelber A. (2018) The roles of vision and antennal  
310 mechanoreception in hawkmoth flight control. *eLife* 7:e37606.
- 311 [37] Dahake A, Jain P, Vogt C, Kandalafi W, Stroock A, Raguso RA. (2022) Floral humidity as  
312 a signal – not a cue – in a nocturnal pollination system. bioRxiv DOI:  
313 <https://doi.org/10.1101/2022.04.27.489805>

- 314 [38] Deora T, Ahmed MA, Daniel TL, Brunton BW. (2021) Tactile active sensing in an insect  
315 plant pollinator. *Journal of Experimental Biology* 224(4):jeb239442.
- 316 [39] Altshuler DL, Dickson WB, Vance JT, Roberts SP, Dickinson MH. (2005) Short-amplitude  
317 high-frequency wing strokes determine the aerodynamics of honeybee flight. *Proceedings of the*  
318 *National Academy of Sciences USA* 102(50):18213-18218.
- 319 [40] Muijres FT, Elzinga MJ, Melis JM, Dickinson MH. (2014) Flies evade looming targets by  
320 executing rapid visually directed banked turns. *Science* 344(6180):172-177.
- 321 [41] Peters JM, Gravish N, Combes SA. (2017) Wings as impellers: honey bees co-opt flight  
322 system to induce nest ventilation and disperse pheromones. *Journal of Experimental Biology*  
323 220(12):2203-2209.
- 324 [42] Marshall JD, Aldarondo DE, Dunn TW, Wang WL, Berman GJ, Ölveczky BP. (2021)  
325 Continuous whole-body 3D kinematic recordings across the rodent behavioral repertoire. *Neuron*  
326 109(3):420-437.
- 327 [43] Ebbesen CL, Froemke RC. (2022) Automatic mapping of multiplexed social receptive fields  
328 by deep learning and GPU-accelerated 3D videography. *Nature Communications* 13:593.
- 329 [44] Nunes TM, Nascimento FS, Turatti IC, Lopes NP, Zucchi R. (2008) Nestmate recognition  
330 in a stingless bee: does the similarity of chemical cues determine guard acceptance? *Animal*  
331 *Behaviour* 75(3):1165-1171.
- 332 [45] Van Zweden JS, d’Ettorre P. (2010) Nestmate recognition in social insects and the role of  
333 hydrocarbons. In Blomquist GJ, Bagnères A-G, eds. *Insect Hydrocarbons: Biology,*  
334 *Biochemistry, and Chemical Ecology*. Cambridge University Press.
- 335 [46] Kannan K, Galizia CG, Nouvian M. (2022) Olfactory strategies in the defensive behaviour  
336 of insects. *Insects* 13(5):470.
- 337 [47] Tibbetts EA. (2002) Visual signals of individual identity in the wasp *Polistes fuscatus*.  
338 *Proceedings of the Royal Society B* 269:1423-1428.
- 339 [48] Ortiz CC, Tibbetts EA. (2020) Visual and chemical signals provide different information  
340 in *Polistes fuscatus* wasps. *Ethology* 127:231-237.
- 341 [49] Cholé H, Junca P, Sandoz J-C. (2015) Appetitive but not aversive olfactory conditioning  
342 modifies antennal movements in honeybees. *Learning and Memory* 22:604-616.
- 343 [50] Lei H, Haney S, Jernigan CM, Guo X, Cook CN, Bazhenov M, Smith BH. (2022) Novelty  
344 detection in early olfactory processing of the honey bee, *Apis mellifera*. *PLoS ONE*  
345 17(3):e0265009.
- 346 [51] Gamboa GJ, Reeve HK, Pfennig DW. (1986) The evolution and ontogeny of nestmate  
347 recognition in social wasps. *Annual Review of Entomology* 31:431-454.

- 348 [52] Dani FR, Jones GR, Destri S, Spencer SH, Turillazzi S. (2001) Deciphering the  
349 recognition signature within the cuticular chemical profile of paper wasps. *Animal Behaviour*  
350 62(1):165-171.
- 351 [53] Bruschini C, Cervo R, Cini A, Pieraccini G, Pontieri L, Signorotti L, Turillazzi S. (2011)  
352 Cuticular hydrocarbons rather than peptides are responsible for nestmate recognition in *Polistes*  
353 *dominulus*. *Chemical Senses* 36(8):715-723.
- 354 [54] Nascimento DL, Nascimento FS. (2012) Acceptance threshold hypothesis is supported by  
355 chemical similarity of cuticular hydrocarbons in a stingless bee, *Melipona asilvai*. *Journal of*  
356 *Chemical Ecology* 28:1432-1440.
- 357 [55] Cini A, Cappa F, Pepiciello I, Platania L, Dapporto L, Cervo R. (2019) Sight in a clique,  
358 scent in a society: plasticity in the use of nestmate recognition cues along colony development in  
359 the social wasp *Polistes dominula*. *Frontiers in Ecology and Evolution* 7:444.
- 360 [56] Zhou C, Rao Y, Rao Y. (2008) A subset of octopaminergic neurons are important for  
361 *Drosophila* aggression. *Nature Neuroscience* 11:1059-1067.
- 362 [57] Hoopfer ED, Jung Y, Inagaki HK, Rubin GM, Anderson DJ. (2015) P1 interneurons  
363 promote a persistent internal state that enhances inter-male aggression in *Drosophila*. *eLife*  
364 4:e11346.
- 365 [58] Anderson DJ, Adolphs R. (2014) A framework for studying emotions across species. *Cell*  
366 157(1):187-200.
- 367 [59] Scharf HM, Suarez AV, Reeve HK, Hauber ME. (2020) The evolution of conspecific  
368 acceptance threshold models. *Philosophical Transactions of the Royal Society B*  
369 375(1802):20190475.
- 370 [60] Rossi N, Baracchi D, Giurfa M, d'Ettorre P. (2019) Pheromone-induced accuracy of  
371 nestmate recognition in carpenter ants: simultaneous decrease in type I and type II errors. *The*  
372 *American Naturalist* 193:267-278.

Wild wasp on nest

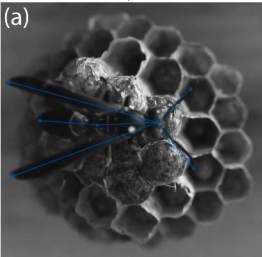

Tracked path

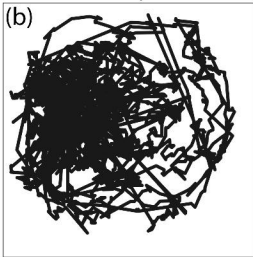

Tracked speed

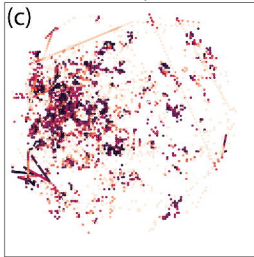

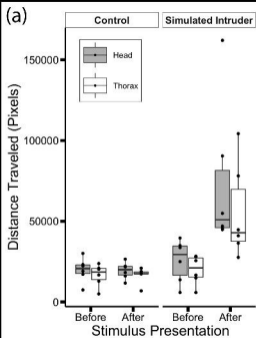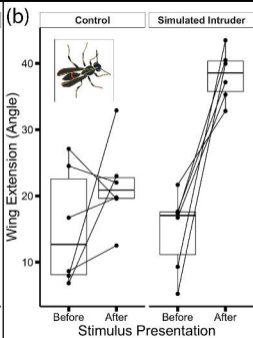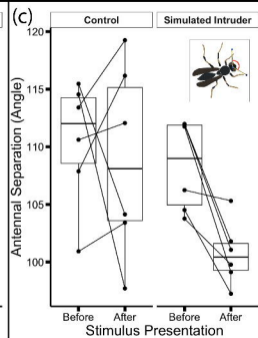

Source: https://www.biorxiv.org/content/10.1101/2022.05.25.493496v1.full.pdf
